# Supplementary material
Source: publisher figshare collection journal article supplement (https://gsapubs.figshare.com/articles/dataset/_/12541919)
Supplement: Supplementary file 1 [file 1]

## Sheet: C14
Appendix 1. 14C Age Information
Well Name	Sample top	Sample base	Depth (mbsf)	sample weight (mg)	dated material	name of lab and sample number	Marine Reservoir effect correction (400 excepted for Cal BP age ranges from 15000 to 17000 in Mediterranean sea => 800)	Corrected age (y BP)	Cal BP age ranges (2s)	Cal BP age median probability	Calibration curve
GDEC-1	0.452941	0.461176	0.457059	60	shells (bivalve)	Poz-46886	400	6260 ± 40	7154-7268	7202	calib6.0.1 IntCal09
GDEC-1	0.650588	0.658824	0.654706	206	shells (bivalve)	Poz-46887	400	9850 ± 50	11190-11359	11252	calib6.0.1 IntCal09
GDEC-1	4.51758	4.53736	4.52747	855	shells (bivalve)	Poz-40529	400	17520 ± 90	20454-21299	20857	calib6.0.1 IntCal09
GDEC-1	4.9033	4.92308	4.91319	548	shells (bivalve)	Poz-40530	400	17820 ± 90	20879-21549	21304	calib6.0.1 IntCal09
GDEC-1	5.96	5.97	5.965	26	shells (bivalve)	Poz-46558	400	17690 ± 90	20774-21448	21127	calib6.0.1 IntCal09
GDEC-1	6.2	6.22	6.21	972	shells (bivalve)	Poz-46888	400	17700 ± 100	20773-21460	21135	calib6.0.1 IntCal09
GDEC-1	6.53	6.55	6.54	564	shells (bivalve)	Poz-40531	400	18280 ± 90	21480-22192	21828	calib6.0.1 IntCal09
GDEC-1	6.81	6.83	6.82	570	shells (bivalve)	Poz-40532	400	18170 ± 90	21395-22101	21714	calib6.0.1 IntCal09
GDEC-1	7.11	7.12	7.115	194	shells (bivalve)	Poz-46889	400	18580 ± 110	21731-22466	22192	calib6.0.1 IntCal09
GDEC-1	7.25	7.26	7.255	22	shells (bivalve)	Poz-46890	400	17780 ± 100	20829-21526	21252	calib6.0.1 IntCal09
GDEC-1	8.6	8.62	8.61	207	shells (bivalve fragment)	Poz-46891	400	17590 ± 100	20498-21363	20956	calib6.0.1 IntCal09
GDEC-1	10.6	10.61	10.605	171	turitella	Poz-40533	400	23740 ± 150	28004-29044	28494	calib6.0.1 IntCal09
GDEC-1	10.7	10.72	10.71	907	shells (bivalve)	Poz-40534	400	24050 ± 150	28442-29338	28887	calib6.0.1 IntCal09
GDEC-1	11.13	11.14	11.135	836	shells (bivalve)	Poz-40535	400	25450 ± 170	29648-30665	30297	calib6.0.1 IntCal09
GDEC-1	11.59	11.6	11.595	682	turitella	Poz-40536	400	25140 ± 160	29544-30329	29961	calib6.0.1 IntCal09
GDEC-1	12.15	12.16	12.155	1325	shells (bivalve)	Poz-40537	400	27670 ± 210	31353-32507	31778	calib6.0.1 IntCal09
GDEC-1	12.72	12.74	12.73	2105	pecten	Poz-40588	400	38700 ± 800	41926-44280	43047	calib6.0.1 IntCal09
GDEC-1	14.09	14.1	14.095	1020	pecten	Poz-46894	400	45600 ± 3000	44215-50000*	47602	calib6.0.1 IntCal09
GDEC-1	14.53	14.54	14.535	49	gastropod	Poz-46895	400		not valid age for CALIB 6.0.1		calib6.0.1 IntCal09
GDEC-1	16.17	16.2	16.185	1793	shells (bivalve)	Poz-40702	400	47400 ± 3000	not valid age for CALIB 6.0.1		calib6.0.1 IntCal09
GDEC-3	0.276543	0.285185	0.280864	78	shells (gastropod)	Poz-46896	400	2180 ± 30	2116-2314	2237	calib6.0.1 IntCal09
GDEC-3	1.14	1.16	1.15	10	bulk benthic foraminifers	Poz-47142	400	9150 ± 50	10226-10433	10319	calib6.0.1 IntCal09
GDEC-3	1.27	1.29	1.28	919	shells (bivalve)	Poz-40646	400	9860 ± 60	11175-11406	11268	calib6.0.1 IntCal09
GDEC-3	1.27	1.28	1.275	270	wood	Poz-46897	400	9680 ± 60	11061-11224	11092	calib6.0.1 IntCal09
GDEC-3	1.52	1.53	1.525	60	shells (gastropod)	Poz-46898	400	9940 ± 60	11228-11620	11373	calib6.0.1 IntCal09
GDEC-3	1.56	1.57	1.565	47	shells (bivalve)	Poz-46899	400	11200 ± 60	12894-13269	13103	calib6.0.1 IntCal09
GDEC-3	2.09	2.14	2.115	113	shells (bivalve)	Poz-46900	400	10800 ± 60	12576-12858	12681	calib6.0.1 IntCal09
GDEC-3	2.33333	2.34286	2.3381	53	shells	Poz-40647	400	7890 ± 40	8591-8793	8697	calib6.0.1 IntCal09
GDEC-3	21.74	21.77	21.76	10	bulk benthic foraminifers	Poz-47185	400	46100 ± 2400	45308-50000*	48047	calib6.0.1 IntCal09
GDEC-4	0.62	0.63	0.625	10	bulk planktic foraminifers	Poz-40548	400	4760 ± 35	5458-5588	5517	calib7.0.0 IntCal13
GDEC-4	1.18	1.19	1.185	10	bulk planktic foraminifers	Poz-40549	400	4600 ± 35	5373-5461	5322	calib7.0.0 IntCal13
GDEC-4	1.7	1.71	1.705	>10	bulk planktic	Poz-33942	400	8860 ± 50	9760-10172	9989	calib7.0.0 IntCal13
GDEC-4	1.97	1.99	1.98	10	bulk planktic foraminifers	Poz-40550	400	8050 ± 50	8746-9090	8926	calib7.0.0 IntCal13
GDEC-4	2.76806	2.7875	2.77778	10	bulk planktic foraminifers	Poz-40590	400	11250 ± 70	12995-13272	13117	calib7.0.0 IntCal13
GDEC-4	3.46	3.48	3.47	10	bulk planktic foraminifers	Poz-40591	400	12100 ± 60	13773-14118	13954	calib7.0.0 IntCal13
GDEC-4	3.99	4	3.995	10	bulk planktic foraminifers	Poz-40593	800	12980 ± 70	15269-15776	15522	calib7.0.0 IntCal13
GDEC-4	5.88	5.91	5.895	10	bulk planktic foraminifers	Poz-40551	400	14940 ± 80	17933-18373	18160	calib7.0.0 IntCal13
GDEC-4	7.44	7.45	7.445	10	bulk planktic foraminifers	Poz-40552	400	17620 ± 90	20986-21613	21304	calib7.0.0 IntCal13
GDEC-4	8.54	8.57	8.555	10	bulk planktic foraminifers	Poz-40554	400	19890 ± 120	23605-24253	23935	calib7.0.0 IntCal13
GDEC-4	9.8	9.82	9.81	10	bulk planktic foraminifers	Poz-40555	400	22470 ± 240	26179-27298	26767	calib7.0.0 IntCal13
GDEC-4	11.79	11.8	11.795	10	bulk planktic foraminifers	Poz-40594	400	27980 ± 250	31572-33124	32359	calib7.0.0 IntCal13
GDEC-4	12.74	12.75	12.745	10	bulk planktic foraminifers	Poz-40595	400	21270 ± 350	24600-26167	25545	calib7.0.0 IntCal13
GDEC-4	13.63	13.64	13.635	10	bulk planktic foraminifers	Poz-40597	400	33300 ± 500	36272-38674	37516	calib7.0.0 IntCal13
GDEC-4	14.54	14.55	14.545	10	bulk planktic foraminifers	Poz-40598	400	35200 ± 600	38535-41072	39758	calib7.0.0 IntCal13
GDEC-6	0	0.015873	0.00793651	>10	bulk planktic foraminifers	Poz-46903	400	350± 35	315-414	398	calib6.0.1 IntCal09
GDEC-6	0.5	0.508929	0.504464	>10	bulk planktic foraminifers	Poz-46904	400	6180 ± 40	6951-7175	7080	calib6.0.1 IntCal09
GDEC-6	1	1.01	1.005	>10	bulk planktic foraminifers	Poz-46905	400	7090 ± 50	7827-8009	7917	calib6.0.1 IntCal09
GDEC-6	1.95	1.96	1.955	>10	Globigerina bulloides foraminifers	Poz-46906	400	10660 ± 60	12524-12714	12600	calib6.0.1 IntCal09
GDEC-6	3.63298	3.64255	3.63777	10	bulk planktic	Poz-33943	400	11930 ± 60	13608-13963	13789	calib6.0.1 IntCal09
GDEC-6	10.03	10.04	10.035	>9	bulk planktic	Poz-33944	400	14280 ± 70	17010-17694	17365	calib6.0.1 IntCal09
GDEC-6	11.91	11.92	11.915	>9	bulk planktic	Poz-33945	400	17080 ± 90	19900-20525	20279	calib6.0.1 IntCal09
GDEC-6	15.24	15.25	15.245	>9	bulk planktic	Poz-33946	400	18470 ± 90	21576-22352	22067	calib6.0.1 IntCal09
GDEC-6	30.0572	30.0851	30.0711	10	bulk planktic foraminifers	Poz-40602	400	21090± 130	24700-25679	25185	calib6.0.1 IntCal09
GDEC-6	30.16	30.18	30.17	>10	Globigerina bulloides foraminifers	Poz-46907	400	22830 ± 170	26889-28067	27592	calib6.0.1 IntCal09
GDEC-6	31.92	31.93	31.925	10	bulk planktic foraminifers	Poz-40603	400	27590± 230	31292-32454	31710	calib6.0.1 IntCal09
GDEC-6	42.5844	42.6125	42.5984	10	bulk planktic foraminifers	Poz-40604	400	24420± 170	28597-29570	29243	calib6.0.1 IntCal09
GDEC-6	42.6591	42.6682	42.6636	>10	Globigerina bulloides foraminifers	Poz-46908	400	26410 ± 250	30583-31304	31020	calib6.0.1 IntCal09
GDEC-8	0.02	0.03	0.025	10	bulk planktic foraminifers	Poz-47092	400	940 ± 30	791-925	853	calib6.0.1 IntCal09
GDEC-8	0.64	0.65	0.645	10	bulk planktic foraminifers	Poz-40599	400	4370 ± 30	4856-4980	4928	calib6.0.1 IntCal09
GDEC-8	1.46	1.47	1.465	10	bulk planktic	Poz-33948	400	6880 ± 40	7620-7795	7713	calib6.0.1 IntCal09
GDEC-8	2.46	2.48	2.47	>10	Globigerina bulloides foraminifers	Poz-46909	400	10430 ± 60	12065-12543	12315	calib6.0.1 IntCal09
GDEC-8	3.22	3.24	3.23	>10	bulk planktic foraminifers	Poz-46910	400	11930 ± 60	13608-13963	13789	calib6.0.1 IntCal09
GDEC-8	4.32	4.33	4.325	>10	Globigerina bulloides foraminifers	Poz-46951	800	12740 ± 70	14689-15580	15112	calib6.0.1 IntCal09
GDEC-8	5.18	5.2	5.19	>10	Globigerina bulloides foraminifers	Poz-46952	400	14160 ± 80	16923-17570	17225	calib6.0.1 IntCal09
GDEC-8	6.19	6.2	6.195	>10	Globigerina bulloides foraminifers	Poz-46953	400	15910 ± 90	18849-19389	19116	calib6.0.1 IntCal09
GDEC-8	9.15	9.17	9.16	10	bulk planktic foraminifers	Poz-40600	400	20200 ± 130	23770-24472	24120	calib6.0.1 IntCal09
GDEC-8	10.15	10.16	10.155	>8	bulk planktic	Poz-33949	400	21500 ± 150	25133-26162	25717	calib6.0.1 IntCal09
GDEC-8	16.1099	16.1396	16.1248	>10	bulk planktic foraminifers	Poz-46954	400	28830 ± 290	32479-34513	33385	calib6.0.1 IntCal09
GDEC-8	19.02	19.03	19.025	>8	bulk planktic	Poz-33950	400	28960 ± 390	32406-34608	33573	calib6.0.1 IntCal09
GDEC-8	21.9824	21.9922	21.9873	10	Globigerina bulloides foraminifers (10 mg)	Poz-40601	400	34600 ± 500	38614-40922	39664	calib6.0.1 IntCal09
GDEC-8	23.9627	23.9725	23.9676	>8	bulk planktic	Poz-33952	400	38500 ± 1400	40815-45060	42916	calib6.0.1 IntCal09
GDEC-8
