# Supplementary material
Source: publisher figshare collection journal article supplement (https://gsapubs.figshare.com/articles/dataset/_/12541919)
Supplement: Supplementary file 1 [file 1]

Sweet, M.L., Gaillot, G.T., Jouet, G., Rittenour, T.M., Toucanne, S., Marsset, T., and Blum, M.D., 2019, Sediment routing from shelf to basin floor in the Quaternary Golo System of Eastern Corsica, France, western Mediterranean Sea: GSA Bulletin, <https://doi.org/10.1130/B35181.1>.

## **Data Repository**

**Appendix 1.**  $^{14}\text{C}$  Age Information.

**Appendix 2.** Luminescence Age Information.

## Appendix 2. Luminescence Age Information

| Core number,<br>Sample interval | USU num. | Num. of<br>aliquots <sup>1</sup> | OSL/ IRSL <sup>2</sup> | Dose rate<br>(Gy/ka) | Equivalent<br>Dose <sup>3</sup> $\pm 2\sigma$ (Gy) | Age $\pm 2\sigma$ (ka)              |
|---------------------------------|----------|----------------------------------|------------------------|----------------------|----------------------------------------------------|-------------------------------------|
| <b>Core GDEC-1:</b>             |          |                                  |                        |                      |                                                    |                                     |
| 5.33-5.52 mbsf                  | USU-1019 | 19 (63)                          | OSL                    | 2.47 $\pm$ 0.09      | 40.77 $\pm$ 7.69                                   | <b>16.52 <math>\pm</math> 3.28</b>  |
| 10.20-10.30 mbsf                | USU-1020 | 26 (40)                          | OSL                    | 2.53 $\pm$ 0.11      | 50.94 $\pm$ 6.67                                   | <b>20.11 <math>\pm</math> 2.93</b>  |
| 13.85-14.00 mbsf                | USU-1021 | 28 (48)                          | OSL                    | 2.28 $\pm$ 0.09      | 69.10 $\pm$ 11.68                                  | <b>30.35 <math>\pm</math> 5.97</b>  |
| 22.95-23.10 mbsf                | USU-1022 | 27 (28)                          | IRSL                   | 3.57 $\pm$ 0.16      | 199.82 $\pm$ 13.11                                 | <b>89.8 <math>\pm</math> 11.8</b>   |
| 27.75-27.90 mbsf                | USU-1023 | 23 (28)                          | IRSL                   | 2.97 $\pm$ 0.13      | 184.00 $\pm$ 16.02                                 | <b>99.5 <math>\pm</math> 10.8</b>   |
| <b>Core GDEC-3:</b>             |          |                                  |                        |                      |                                                    |                                     |
| 6.13-6.19 mbsf                  | USU-1002 | 18 (67)                          | OSL                    | 2.32 $\pm$ 0.09      | 31.71 $\pm$ 6.75                                   | <b>13.70 <math>\pm</math> 1.69</b>  |
| 12.50-12.67 mbsf                | USU-1003 | 17 (57)                          | OSL                    | 2.17 $\pm$ 0.09      | 42.81 $\pm$ 10.45                                  | <b>19.72 <math>\pm</math> 2.70</b>  |
| 15.30-15.45 mbsf                | USU-1004 | 16 (53)                          | OSL                    | 2.59 $\pm$ 0.11      | 51.35 $\pm$ 7.72                                   | <b>19.84 <math>\pm</math> 1.95</b>  |
| 30.65-30.80 mbsf                | USU-1005 | 15 (17)                          | IRSL                   | 2.87 $\pm$ 0.12      | 99.76 $\pm$ 11.53                                  | <b>58.62 <math>\pm</math> 7.47</b>  |
| 37.45-37.60 mbsf                | USU-1006 | 24 (43)                          | IRSL                   | 3.48 $\pm$ 0.14      | 139.19 $\pm$ 12.78                                 | <b>73.70 <math>\pm</math> 10.98</b> |
| <b>Core GDEC-6:</b>             |          |                                  |                        |                      |                                                    |                                     |
| 12.53-12.65 mbsf                | USU-1013 | 25 (50)                          | OSL                    | 2.26 $\pm$ 0.09      | 37.70 $\pm$ 2.89                                   | <b>16.66 <math>\pm</math> 1.64</b>  |
| 20.10-20.20 mbsf                | USU-1014 | 26 (50)                          | OSL                    | 2.04 $\pm$ 0.08      | 43.21 $\pm$ 4.73                                   | <b>21.19 <math>\pm</math> 2.67</b>  |
| 28.60-28.75 mbsf                | USU-1015 | 26 (53)                          | OSL                    | 1.85 $\pm$ 0.07      | 41.15 $\pm$ 6.53                                   | <b>22.22 <math>\pm</math> 3.79</b>  |
| 34.53-34.66 mbsf                | USU-1016 | 21 (62)                          | OSL                    | 1.80 $\pm$ 0.07      | 43.20 $\pm$ 9.86                                   | <b>24.03 <math>\pm</math> 5.69</b>  |
| 40.15-40.30 mbsf                | USU-1017 | 23 (50)                          | OSL                    | 1.95 $\pm$ 0.07      | 56.52 $\pm$ 9.61                                   | <b>28.97 <math>\pm</math> 5.25</b>  |
| 46.50-46.65 mbsf                | USU-1018 | 25 (62)                          | OSL                    | 1.69 $\pm$ 0.06      | 51.80 $\pm$ 6.03                                   | <b>36.67 <math>\pm</math> 4.05</b>  |
| <b>Core GDEC-8:</b>             |          |                                  |                        |                      |                                                    |                                     |
| 38.35-38.50 mbsf                | USU-1007 | 15 (21)                          | IRSL                   | 3.22 $\pm$ 0.35      | 111.59 $\pm$ 6.94                                  | <b>62.12 <math>\pm</math> 8.88</b>  |
| 61.98-62.10 mbsf                | USU-1008 | 21 (24)                          | IRSL                   | 2.58 $\pm$ 0.28      | 108.81 $\pm$ 8.07                                  | <b>65.63 <math>\pm</math> 9.31</b>  |
| 82.30-82.45 mbsf                | USU-1009 | 22 (22)                          | IRSL                   | 2.45 $\pm$ 0.26      | 149.70 $\pm$ 14.44                                 | <b>105.1 <math>\pm</math> 16.9</b>  |
| 88.40-88.55 mbsf                | USU-1012 | 24 (33)                          | IRSL                   | 2.34 $\pm$ 0.25      | 133.07 $\pm$ 11.74                                 | <b>103.5 <math>\pm</math> 15.6</b>  |
| 90.00-90.15 mbsf                | USU-1010 | 28 (33)                          | IRSL                   | 2.16 $\pm$ 0.23      | 139.97 $\pm$ 5.91                                  | <b>119.1 <math>\pm</math> 17.1</b>  |
| 98.80-98.95 mbsf                | USU-1011 | 22 (22)                          | IRSL                   | 2.17 $\pm$ 0.24      | 149.19 $\pm$ 10.10                                 | <b>126.9 <math>\pm</math> 18.3</b>  |

<sup>1</sup> Number of aliquots used in age calculation and number of aliquots analyzed in parentheses.

<sup>2</sup> Optically stimulated luminescence (OSL) age analysis using the single-aliquot regenerative-dose procedure of Murray and Wintle (2000) on 2 mm small-aliquots of quartz sand; or infrared stimulated luminescence (IRSL) age analysis at 50°C following Wallinga et al. (2000). IRSL ages corrected for fading following the methods by Auclair et al. (2003) and Huntley and Lamothe (2001).

<sup>3</sup> Equivalent dose (D<sub>e</sub>) calculated using the Central Age Model (CAM) Galbraith and Roberts (2012).

Table 2. Dose rate information

| Lab-#    | Grain size<br>( $\mu\text{m}$ ) | H <sub>2</sub> O content<br>(wt. %) | K (%) | Rb (ppm) | Th (ppm) | U (ppm) |
|----------|---------------------------------|-------------------------------------|-------|----------|----------|---------|
| USU-1002 | 150-250                         | 62.7                                | 2.66  | 128.5    | 13.4     | 2.1     |
| USU-1003 | 150-250                         | 55.9                                | 2.32  | 129.5    | 13.7     | 1.6     |
| USU-1004 | 150-250                         | 52.9                                | 2.52  | 140.0    | 17.8     | 2.1     |
| USU-1005 | 150-250                         | 36.5                                | 1.89  | 98.6     | 8.4      | 1.0     |
| USU-1006 | 150-250                         | 45.4                                | 2.49  | 117.0    | 10.8     | 1.7     |
| USU-1007 | 150-250                         | 40.4                                | 2.15  | 103.5    | 8.0      | 1.3     |
| USU-1008 | 75-150                          | 40.4                                | 1.98  | 99.4     | 5.8      | 0.8     |
| USU-1009 | 75-150                          | 40.4                                | 1.81  | 92.0     | 5.7      | 0.8     |
| USU-1010 | 75-150                          | 40.4                                | 1.42  | 71.8     | 5.5      | 0.8     |
| USU-1011 | 75-150                          | 40.4                                | 1.43  | 72.2     | 5.6      | 0.8     |
| USU-1012 | 150-250                         | 40.4                                | 1.45  | 72.6     | 5.6      | 0.8     |
| USU-1013 | 75-150                          | 41.2                                | 2.09  | 121.4    | 10.6     | 2.1     |
| USU-1014 | 150-250                         | 36.3                                | 2.08  | 113.0    | 9.1      | 1.0     |
| USU-1015 | 150-250                         | 38.8                                | 2.05  | 103.0    | 6.5      | 1.0     |
| USU-1016 | 150-250                         | 36.3                                | 2.01  | 112.0    | 5.8      | 0.8     |
| USU-1017 | 150-250                         | 20.6                                | 1.96  | 92.9     | 4.4      | 0.8     |
| USU-1018 | 150-250                         | 43.9                                | 1.91  | 103.5    | 6.2      | 1.1     |
| USU-1019 | 75-150                          | 52.6                                | 2.75  | 148.5    | 8.7      | 2.5     |
| USU-1020 | 75-150                          | 34.6                                | 1.87  | 113.0    | 13.6     | 2.9     |
| USU-1021 | 75-150                          | 39.1                                | 1.83  | 111.5    | 11.5     | 2.7     |
| USU-1022 | 63-125                          | 39.5                                | 1.90  | 111.5    | 10.8     | 2.7     |
| USU-1023 | 90-150                          | 39.5                                | 1.56  | 90.5     | 8.0      | 2.3     |
